# Supplementary material
Source: publisher figshare collection journal article supplement (https://aacr.figshare.com/articles/dataset/_/23822932)

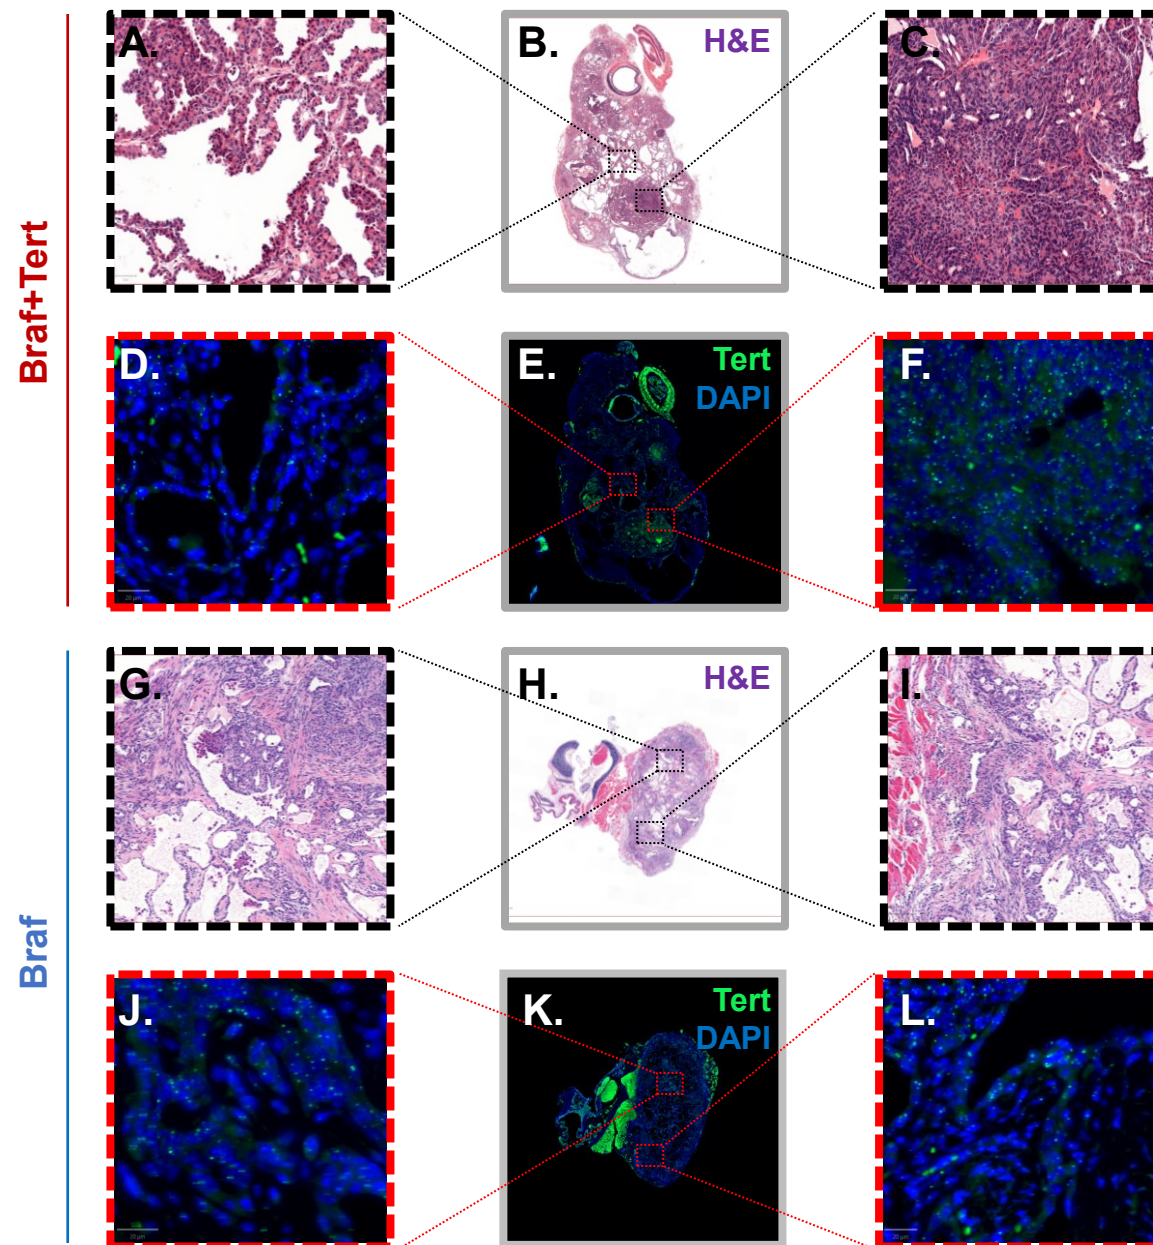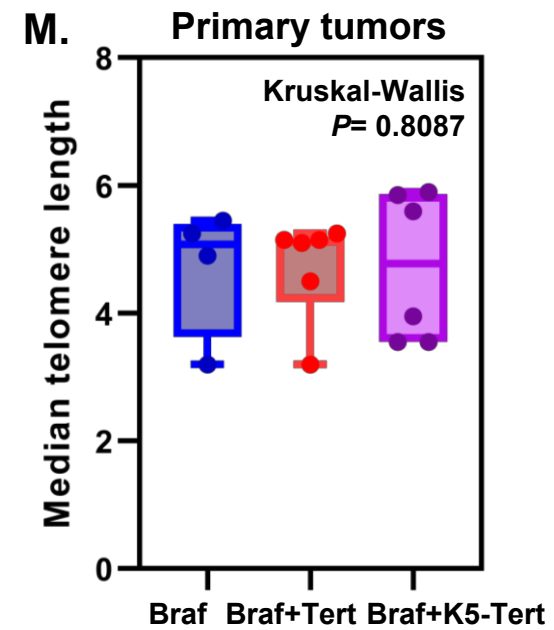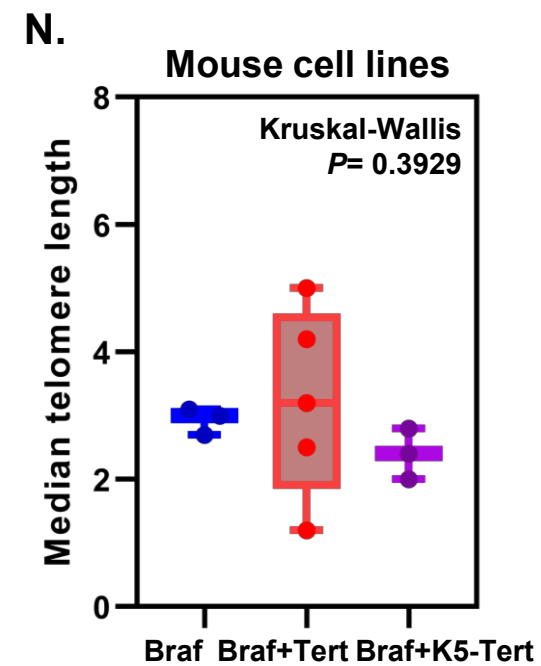

Supplement: Supplementary file 1 [file 41803171]
